# Supplementary material for: Short Copy Number Variations Potentially Associated with Tonic Immobility Responses in Newly Hatched Chicks
Source: PubMed Central journal article supplement (PMC3839970; doi:10.1371/journal.pone.0080205), 2013-11-25
Supplement: pone.0080205.s002.pdf [file pone.0080205.s002.pdf]

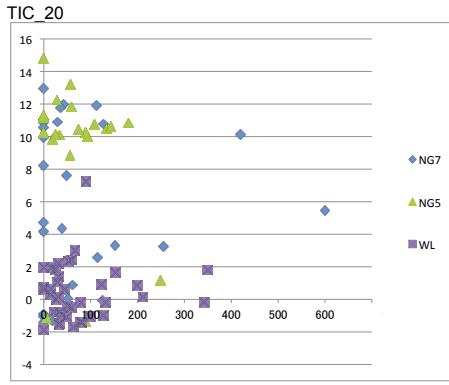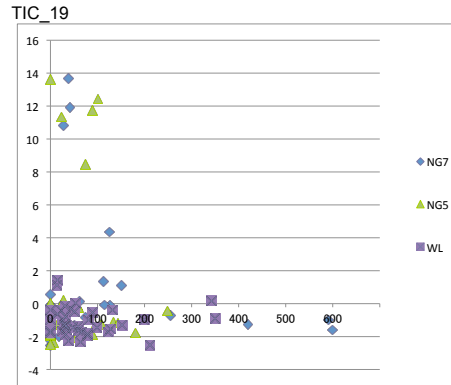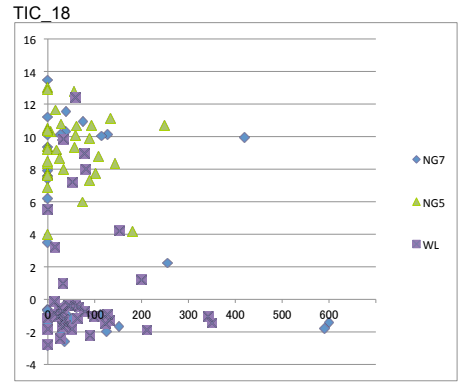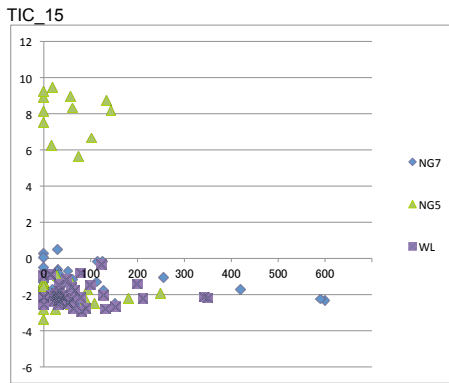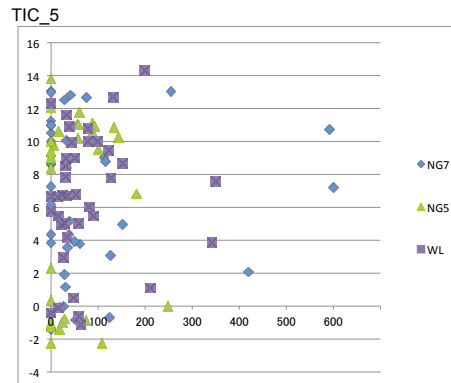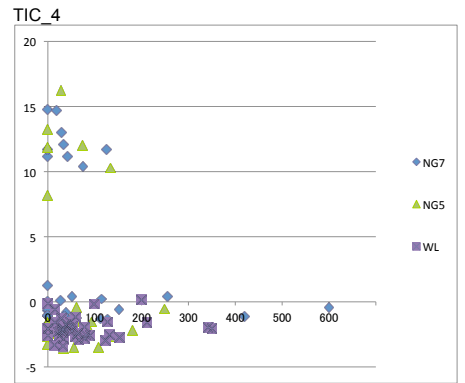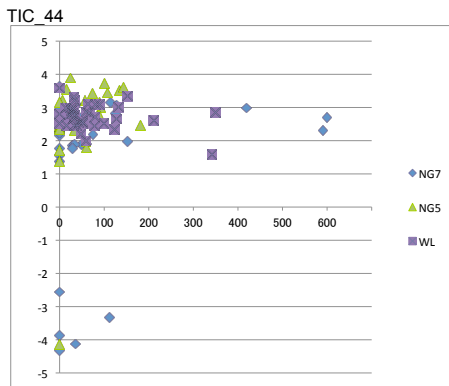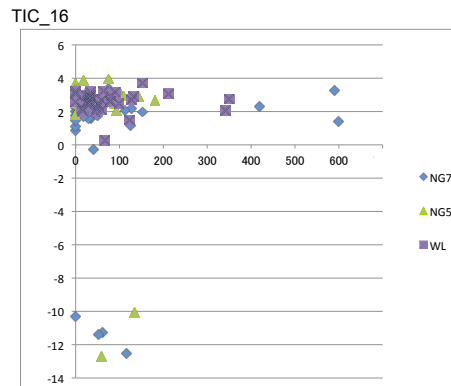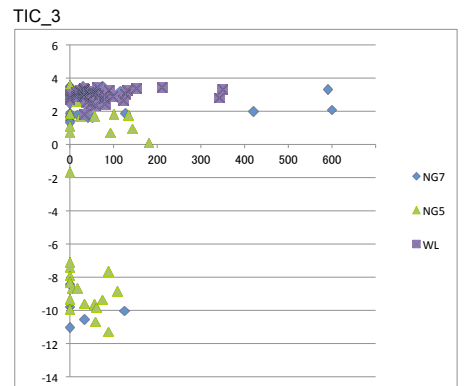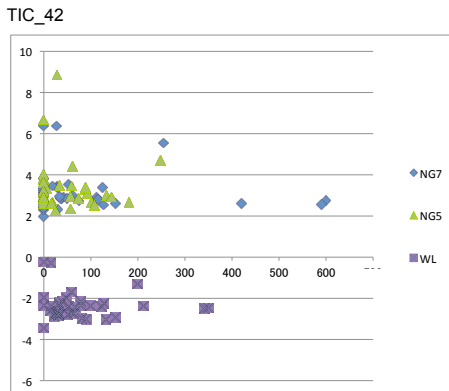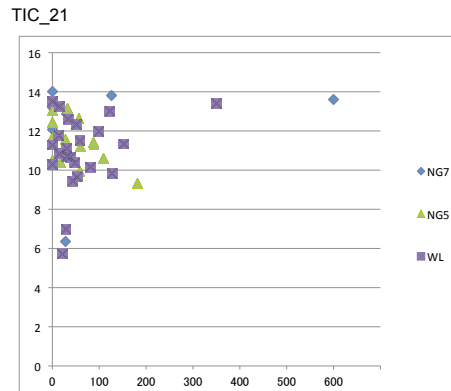

Figure S2
