# Supplementary material for: Short Copy Number Variations Potentially Associated with Tonic Immobility Responses in Newly Hatched Chicks
Source: PubMed Central journal article supplement (PMC3839970; doi:10.1371/journal.pone.0080205), 2013-11-25
Supplement: pone.0080205.s003.pdf [file pone.0080205.s003.pdf]

Supplementary Table1

List of primers used for quantitative PCR validation

| Locus  | Forward (5'-3')        | Reverse (5'-3')        |
|--------|------------------------|------------------------|
| TIC_3  | CCAAACCAGATTGGAAGGAA   | GGAGAGTGTTGGTCTCACTCCT |
| TIC_4  | TTCCACGTTTGCTAGTAACGAC | CCAAGCTGAGGTGGCTCTAC   |
| TIC_5  | GAATGCCATGAAAATCCAAA   | TCGTGGAGAGGGTTTTGTTC   |
| TIC_15 | AAACCAAGCCAGAAAGCAGA   | GCTCTTTGCTTGGGAAGATG   |
| TIC_16 | AGCAGTGACACTTGCCTTGA   | TCTACTCCTGTGATGGGTGG   |
| TIC_18 | GCCCAAATGCCTTTAGATGA   | ACTTGGGAGAAGGGAGCATT   |
| TIC_19 | CTCTTCTCCCACCCACTTCA   | TGAAACACCAGCAACTGAGC   |
| TIC_20 | AAGCAAGCCCAGAAAAGTCA   | GGGTGGCACACATGATGTTA   |
| TIC_21 | TCTTTGCAACATAGCCCACA   | TCACCAGTGGGAGACAGAAA   |
| TIC_42 | AGCCTGGTGAACAGAGGTGT   | AGGGGGACTCACAGTTGATG   |
| TIC_44 | AGCAAGAGCAGGGAAGTGAT   | ACTTGTGCTCCAGACCTTGC   |
| ACTB*  | TGCGTGACATCAAGGAGAAG   | CCAAGAAAGATGGCTGGAAG   |

\* ACTB ( $\beta$ -actin) is chosen as a reference locus to standardize Ct value of each sample
