# Supplementary material for: Short Copy Number Variations Potentially Associated with Tonic Immobility Responses in Newly Hatched Chicks
Source: PubMed Central journal article supplement (PMC3839970; doi:10.1371/journal.pone.0080205), 2013-11-25
Supplement: pone.0080205.s004.pdf [file pone.0080205.s004.pdf]

Table S2 Another sets of candidate short Copy Number Variations examined in this study

| loci*  | #Probe | ProbeName          | Start     | Stop      | bp    | Description                                                                 |
|--------|--------|--------------------|-----------|-----------|-------|-----------------------------------------------------------------------------|
| TIC_01 | 2,4    | A_94_P10089386-90  | 22872846  | 22873829  | 983   | Unknown                                                                     |
| TIC_02 | 2,4    | A_94_P10096868-73  | 24753436  | 24754586  | 1150  | Unknown                                                                     |
| TIC_06 | 2      | A_94_P10130437     | 32904537  | 32904596  | 59    | Unknown                                                                     |
| TIC_07 | 2,4    | A_94_P10135829-884 | 34305780  | 34320308  | 14528 | Unknown                                                                     |
| TIC_08 | 2,4    | A_94_P10160758     | 40358597  | 40358656  | 59    | Unknown                                                                     |
| TIC_09 | 2,4    | A_94_P10311218-46  | 79525472  | 79541628  | 16156 | Unknown                                                                     |
| TIC_10 | 2,4    | A_94_P10313882     | 80234725  | 80234784  | 59    | inhibitor of growth family, member 4 (ING4), mRNA.                          |
| TIC_11 | 2,4    | A_94_P10316803-08  | 81006736  | 81008356  | 1620  | Unknown                                                                     |
| TIC_12 | 2      | A_94_P10319555-57  | 81811178  | 81812063  | 885   | Unknown                                                                     |
| TIC_13 | 2      | A_94_P10326890-02  | 83636405  | 83636963  | 558   | Unknown                                                                     |
| TIC_14 | 2,4    | A_94_P10332758-60  | 85062055  | 85062470  | 415   | mRNA for chLAMP, g9-isoform.                                                |
| TIC_17 | 2,4    | A_94_P10659203     | 170385908 | 170385967 | 59    | Unknown                                                                     |
| TIC_22 | 2      | A_94_P10736575-77  | 190339899 | 190340664 | 765   | finished cDNA, clone ChEST767d1.                                            |
| TIC_23 | 2      | A_94_P10076182-83  | 19536495  | 19536737  | 242   | Unknown                                                                     |
| TIC_24 | 2      | A_94_P10078838-40  | 20226034  | 20226523  | 489   | Unknown                                                                     |
| TIC_25 | 2,4    | A_94_P10083862-65  | 21512802  | 21513741  | 939   | Unknown                                                                     |
| TIC_26 | 2      | A_94_P10089202-04  | 22828030  | 22828536  | 506   | Unknown                                                                     |
| TIC_27 | 2,4    | A_94_P10098208-215 | 25086631  | 25088097  | 1466  | Unknown                                                                     |
| TIC_28 | 2      | A_94_P10101898-99  | 26014926  | 26015212  | 286   | Unknown                                                                     |
| TIC_29 | 2      | A_94_P10102375-76  | 26141518  | 26141779  | 261   | Unknown                                                                     |
| TIC_30 | 2      | A_94_P10108919-20  | 27676955  | 27677474  | 519   | Unknown                                                                     |
| TIC_31 | 2      | A_94_P10113167-68  | 28683397  | 28683629  | 232   | Unknown                                                                     |
| TIC_32 | 2      | A_94_P10117902-03  | 29874452  | 29874793  | 341   | Unknown                                                                     |
| TIC_33 | 2      | A_94_P10135031-32  | 34072581  | 34072939  | 358   | Unknown                                                                     |
| TIC_34 | 2      | A_94_P10139876-78  | 35330595  | 35331030  | 435   | SLIT-ROBO Rho GTPase activating protein 1 (SRGAP1), mRNA.                   |
| TIC_35 | 2      | A_94_P10152724-25  | 38388598  | 38388927  | 329   | tryptophan hydroxylase 2 (TPH2), mRNA.                                      |
| TIC_36 | 2      | A_94_P10169173-74  | 42380167  | 42380480  | 313   | finished cDNA, clone ChEST384n3.                                            |
| TIC_37 | 2      | A_94_P10309480-81  | 79031407  | 79031637  | 230   | Unknown                                                                     |
| TIC_38 | 2      | A_94_P10324067-69  | 82937966  | 82938453  | 487   | Unknown                                                                     |
| TIC_39 | 2      | A_94_P10677470-71  | 175076255 | 175078030 | 1775  | Unknown                                                                     |
| TIC_40 | 2,4    | A_94_P10681160-64  | 176020653 | 176021692 | 1039  | Unknown                                                                     |
| TIC_41 | 2      | A_94_P10683280-81  | 176583535 | 176583769 | 234   | family with sequence similarity 48, member A (FAM48A), mRNA.                |
| TIC_43 | 2      | A_94_P10699818-20  | 180745478 | 180746026 | 548   | Unknown                                                                     |
| TIC_45 | 4      | A_94_P10702860-64  | 181493755 | 181495047 | 1292  | Unknown                                                                     |
| TIC_46 | 2      | A_94_P10719022-23  | 185652188 | 185652528 | 340   | glutamate receptor, ionotropic, AMPA 4 (GRIA4), transcript variant 1, mRNA. |
| TIC_47 | 4      | A_94_P10719880-85  | 185883061 | 185884113 | 1052  | Unknown                                                                     |
| TIC_48 | 4      | A_94_P10725016-28  | 187206942 | 187209729 | 2787  | Unknown                                                                     |
| TIC_49 | 2      | A_94_P10726129-30  | 187502866 | 187503172 | 306   | Unknown                                                                     |
| TIC_50 | 2      | A_94_P10727904-06  | 187990621 | 187991140 | 519   | contactin 5 (CNTN5), mRNA.                                                  |
| TIC_51 | 2      | A_94_P10730749-52  | 188810333 | 188811027 | 694   | Unknown                                                                     |
| TIC_52 | 2,4    | A_94_P10742305-09  | 191846266 | 191847146 | 880   | Unknown                                                                     |

**Note:** These loci did not show any quantitative difference in validation PCR (see text for details).
